# Supplementary material
Source: publisher figshare collection journal article supplement (https://acs.figshare.com/ndownloader/files/4519078)
Supplement: Supplementary file 1 [file 4519078]

HEADER
REMARK Spartan exported Tue Jan 30 13:59:25 2007
HETATM    1  H   UNK  0001       1.837  -3.169  -9.466
HETATM    2  C   UNK  0001       1.681  -3.092  -8.385
HETATM    3  H   UNK  0001       3.301  -1.718  -8.074
HETATM    4  C   UNK  0001       2.486  -2.292  -7.620
HETATM    5  C   UNK  0001       0.413  -3.755  -6.438
HETATM    6  C   UNK  0001       2.276  -2.195  -6.218
HETATM    7  C   UNK  0001       0.637  -3.833  -7.787
HETATM    8  C   UNK  0001       1.228  -2.924  -5.622
HETATM    9  C   UNK  0001       3.126  -1.395  -5.412
HETATM   10  H   UNK  0001       0.008  -4.471  -8.416
HETATM   11  O   UNK  0001       0.015  -3.534  -3.666
HETATM   12  H   UNK  0001      -0.396  -4.333  -5.978
HETATM   13  C   UNK  0001       2.909  -1.267  -4.060
HETATM   14  H   UNK  0001       3.974  -0.883  -5.883
HETATM   15  C   UNK  0001       3.889  -0.496  -3.276
HETATM   16  C   UNK  0001       1.796  -1.915  -3.449
HETATM   17  C   UNK  0001       1.471  -1.666  -2.035
HETATM   18  C   UNK  0001       1.026  -2.790  -4.208
HETATM   19  O   UNK  0001       1.478  -3.947  -1.380
HETATM   20  C   UNK  0001       1.685  -2.782  -1.068
HETATM   21  H   UNK  0001       1.149   0.819   0.045
HETATM   22  C   UNK  0001       2.078  -2.360   0.296
HETATM   23  C   UNK  0001       0.944  -0.513  -1.576
HETATM   24  C   UNK  0001       1.628  -1.116   0.758
HETATM   25  C   UNK  0001       2.883  -3.166   1.100
HETATM   26  C   UNK  0001       0.479   0.569  -2.464
HETATM   27  H   UNK  0001       1.693   0.303   2.395
HETATM   28  C   UNK  0001      -0.732  -0.211   0.283
HETATM   29  C   UNK  0001       3.261  -2.726   2.362
HETATM   30  H   UNK  0001       3.213  -4.145   0.731
HETATM   31  H   UNK  0001       3.891  -3.359   2.996
HETATM   32  C   UNK  0001       2.835  -1.483   2.821
HETATM   33  H   UNK  0001       3.132  -1.134   3.816
HETATM   34  C   UNK  0001       2.026  -0.682   2.024
HETATM   35  C   UNK  0001       5.825   0.932  -1.863
HETATM   36  C   UNK  0001       4.133   0.846  -3.577
HETATM   37  C   UNK  0001       4.625  -1.120  -2.265
HETATM   38  C   UNK  0001       5.590  -0.406  -1.564
HETATM   39  C   UNK  0001       5.095   1.556  -2.869
HETATM   40  H   UNK  0001       3.560   1.335  -4.374
HETATM   41  H   UNK  0001       4.438  -2.173  -2.028
HETATM   42  H   UNK  0001       6.166  -0.900  -0.774
HETATM   43  H   UNK  0001       5.281   2.608  -3.108
HETATM   44  H   UNK  0001       6.586   1.492  -1.309
HETATM   45  C   UNK  0001      -0.469   2.610  -4.104
HETATM   46  C   UNK  0001       1.192   1.763  -2.575
HETATM   47  C   UNK  0001      -0.713   0.401  -3.175
HETATM   48  C   UNK  0001      -1.183   1.421  -3.993
HETATM   49  C   UNK  0001       0.716   2.779  -3.396
HETATM   50  H   UNK  0001       2.137   1.889  -2.031
HETATM   51  H   UNK  0001      -1.270  -0.545  -3.080
HETATM   52  H   UNK  0001      -2.114   1.285  -4.553
HETATM   53  H   UNK  0001       1.279   3.714  -3.485
HETATM   54  H   UNK  0001      -0.840   3.412  -4.751
HETATM   55  H   UNK  0001       0.318  -3.815  -2.796
HETATM   56  C   UNK  0001      -0.713   2.035   1.407
HETATM   57  C   UNK  0001      -0.950   0.586   1.546
HETATM   58  C   UNK  0001      -1.302  -1.479   2.799
HETATM   59  C   UNK  0001      -1.387  -1.561   0.330
HETATM   60  C   UNK  0001      -1.322   0.010   2.708
HETATM   61  C   UNK  0001      -1.669  -2.186   1.552
HETATM   62  C   UNK  0001      -1.768  -2.193  -0.856
HETATM   63  C   UNK  0001      -1.692   0.765   3.917
HETATM   64  H   UNK  0001      -2.488  -3.919   2.546
HETATM   65  O   UNK  0001      -0.938  -2.052   3.818
HETATM   66  C   UNK  0001      -2.393  -3.433  -0.823
HETATM   67  H   UNK  0001      -1.567  -1.705  -1.825
HETATM   68  H   UNK  0001      -2.678  -3.922  -1.762
HETATM   69  C   UNK  0001      -2.651  -4.057   0.394
HETATM   70  H   UNK  0001      -3.137  -5.038   0.416
HETATM   71  C   UNK  0001      -2.290  -3.435   1.583
HETATM   72  C   UNK  0001      -0.193   4.755   1.111
HETATM   73  C   UNK  0001       0.444   2.591   1.960
HETATM   74  C   UNK  0001      -1.605   2.843   0.703
HETATM   75  C   UNK  0001      -1.343   4.201   0.559
HETATM   76  C   UNK  0001       0.700   3.949   1.812
HETATM   77  H   UNK  0001       1.144   1.945   2.513
HETATM   78  H   UNK  0001      -2.523   2.410   0.283
HETATM   79  H   UNK  0001      -2.047   4.835   0.010
HETATM   80  H   UNK  0001       1.604   4.384   2.251
HETATM   81  H   UNK  0001       0.010   5.825   0.997
HETATM   82  O   UNK  0001       0.298   0.047   5.083
HETATM   83  C   UNK  0001      -0.846   0.792   5.021
HETATM   84  C   UNK  0001      -3.207   2.286   5.049
HETATM   85  C   UNK  0001      -1.114   1.646   6.142
HETATM   86  C   UNK  0001      -2.928   1.474   3.976
HETATM   87  C   UNK  0001      -2.296   2.411   6.130
HETATM   88  C   UNK  0001      -0.234   1.750   7.253
HETATM   89  C   UNK  0001      -3.964   1.323   2.939
HETATM   90  H   UNK  0001      -3.496   3.876   7.197
HETATM   91  H   UNK  0001      -4.151   2.844   5.086
HETATM   92  C   UNK  0001      -0.526   2.596   8.290
HETATM   93  H   UNK  0001       0.682   1.148   7.273
HETATM   94  H   UNK  0001       0.152   2.678   9.145
HETATM   95  C   UNK  0001      -1.707   3.372   8.272
HETATM   96  H   UNK  0001      -1.917   4.042   9.111
HETATM   97  C   UNK  0001      -2.576   3.282   7.218
HETATM   98  H   UNK  0001       0.097  -0.800   4.671
HETATM   99  C   UNK  0001      -6.003   1.055   1.055
HETATM  100  C   UNK  0001      -4.428   2.441   2.241
HETATM  101  C   UNK  0001      -4.531   0.071   2.691
HETATM  102  C   UNK  0001      -5.548  -0.059   1.752
HETATM  103  C   UNK  0001      -5.442   2.303   1.300
HETATM  104  H   UNK  0001      -3.987   3.425   2.439
HETATM  105  H   UNK  0001      -4.170  -0.807   3.238
HETATM  106  H   UNK  0001      -5.991  -1.043   1.563
HETATM  107  H   UNK  0001      -5.801   3.182   0.754
HETATM  108  H   UNK  0001      -6.804   0.949   0.316
HETATM  109  C   UNK  0001       0.773  -0.232  -0.103
HETATM  110  H   UNK  0001      -1.256   0.370  -0.528
CONECT    1    2
CONECT    2    1    4    7
CONECT    3    4
CONECT    4    2    6    3
CONECT    5    7    8   12
CONECT    6    4    8    9
CONECT    7    2    5   10
CONECT    8    6    5   18
CONECT    9    6   13   14
CONECT   10    7
CONECT   11   18   55
CONECT   12    5
CONECT   13    9   16   15
CONECT   14    9
CONECT   15   13   37   36
CONECT   16   13   18   17
CONECT   17   16   23   20
CONECT   18    8   16   11
CONECT   19   20
CONECT   20   22   19   17
CONECT   21  109
CONECT   22   20   24   25
CONECT   23   17  109   26
CONECT   24   22  109   34
CONECT   25   22   29   30
CONECT   26   23   47   46
CONECT   27   34
CONECT   28   59   57  109  110
CONECT   29   25   32   31
CONECT   30   25
CONECT   31   29
CONECT   32   29   34   33
CONECT   33   32
CONECT   34   24   32   27
CONECT   35   38   39   44
CONECT   36   39   15   40
CONECT   37   15   38   41
CONECT   38   37   35   42
CONECT   39   35   36   43
CONECT   40   36
CONECT   41   37
CONECT   42   38
CONECT   43   39
CONECT   44   35
CONECT   45   48   49   54
CONECT   46   49   26   50
CONECT   47   26   48   51
CONECT   48   47   45   52
CONECT   49   45   46   53
CONECT   50   46
CONECT   51   47
CONECT   52   48
CONECT   53   49
CONECT   54   45
CONECT   55   11
CONECT   56   57   74   73
CONECT   57   56   28   60
CONECT   58   65   60   61
CONECT   59   28   61   62
CONECT   60   57   58   63
CONECT   61   59   58   71
CONECT   62   59   66   67
CONECT   63   60   83   86
CONECT   64   71
CONECT   65   58
CONECT   66   62   69   68
CONECT   67   62
CONECT   68   66
CONECT   69   66   71   70
CONECT   70   69
CONECT   71   61   69   64
CONECT   72   75   76   81
CONECT   73   76   56   77
CONECT   74   56   75   78
CONECT   75   74   72   79
CONECT   76   72   73   80
CONECT   77   73
CONECT   78   74
CONECT   79   75
CONECT   80   76
CONECT   81   72
CONECT   82   83   98
CONECT   83   63   85   82
CONECT   84   86   87   91
CONECT   85   83   87   88
CONECT   86   63   84   89
CONECT   87   85   84   97
CONECT   88   85   92   93
CONECT   89   86  101  100
CONECT   90   97
CONECT   91   84
CONECT   92   88   95   94
CONECT   93   88
CONECT   94   92
CONECT   95   92   97   96
CONECT   96   95
CONECT   97   87   95   90
CONECT   98   82
CONECT   99  102  103  108
CONECT  100  103   89  104
CONECT  101   89  102  105
CONECT  102  101   99  106
CONECT  103   99  100  107
CONECT  104  100
CONECT  105  101
CONECT  106  102
CONECT  107  103
CONECT  108   99
CONECT  109   23   24   21   28
CONECT  110   28
END
